# Supplementary material for: From Sweeps to Volumes: 3D Multiscan Stitching Enables Operator-Independent, Large-Area Abdominal Ultrasound—A Phantom-and-Patient Feasibility Study
Source: Research Square preprint supplement (doi:10.21203/rs.3.rs-7897997/v1), 2025-11-05
Supplement: Supplementary file 1 [file 3a8eac341bd933f052e6daaa.docx]

**Supplemental material**

**Supplement 1:** **Standardization of the workflow for recording multiscan tomographic ultrasound volumes**. On the left side, the starting position of the ultrasound probes to record a comprehensive liver scan is illustrated. On the right side, representative tomographic ultrasound images are displayed in the transverse (middle) and sagittal planes (right side). **
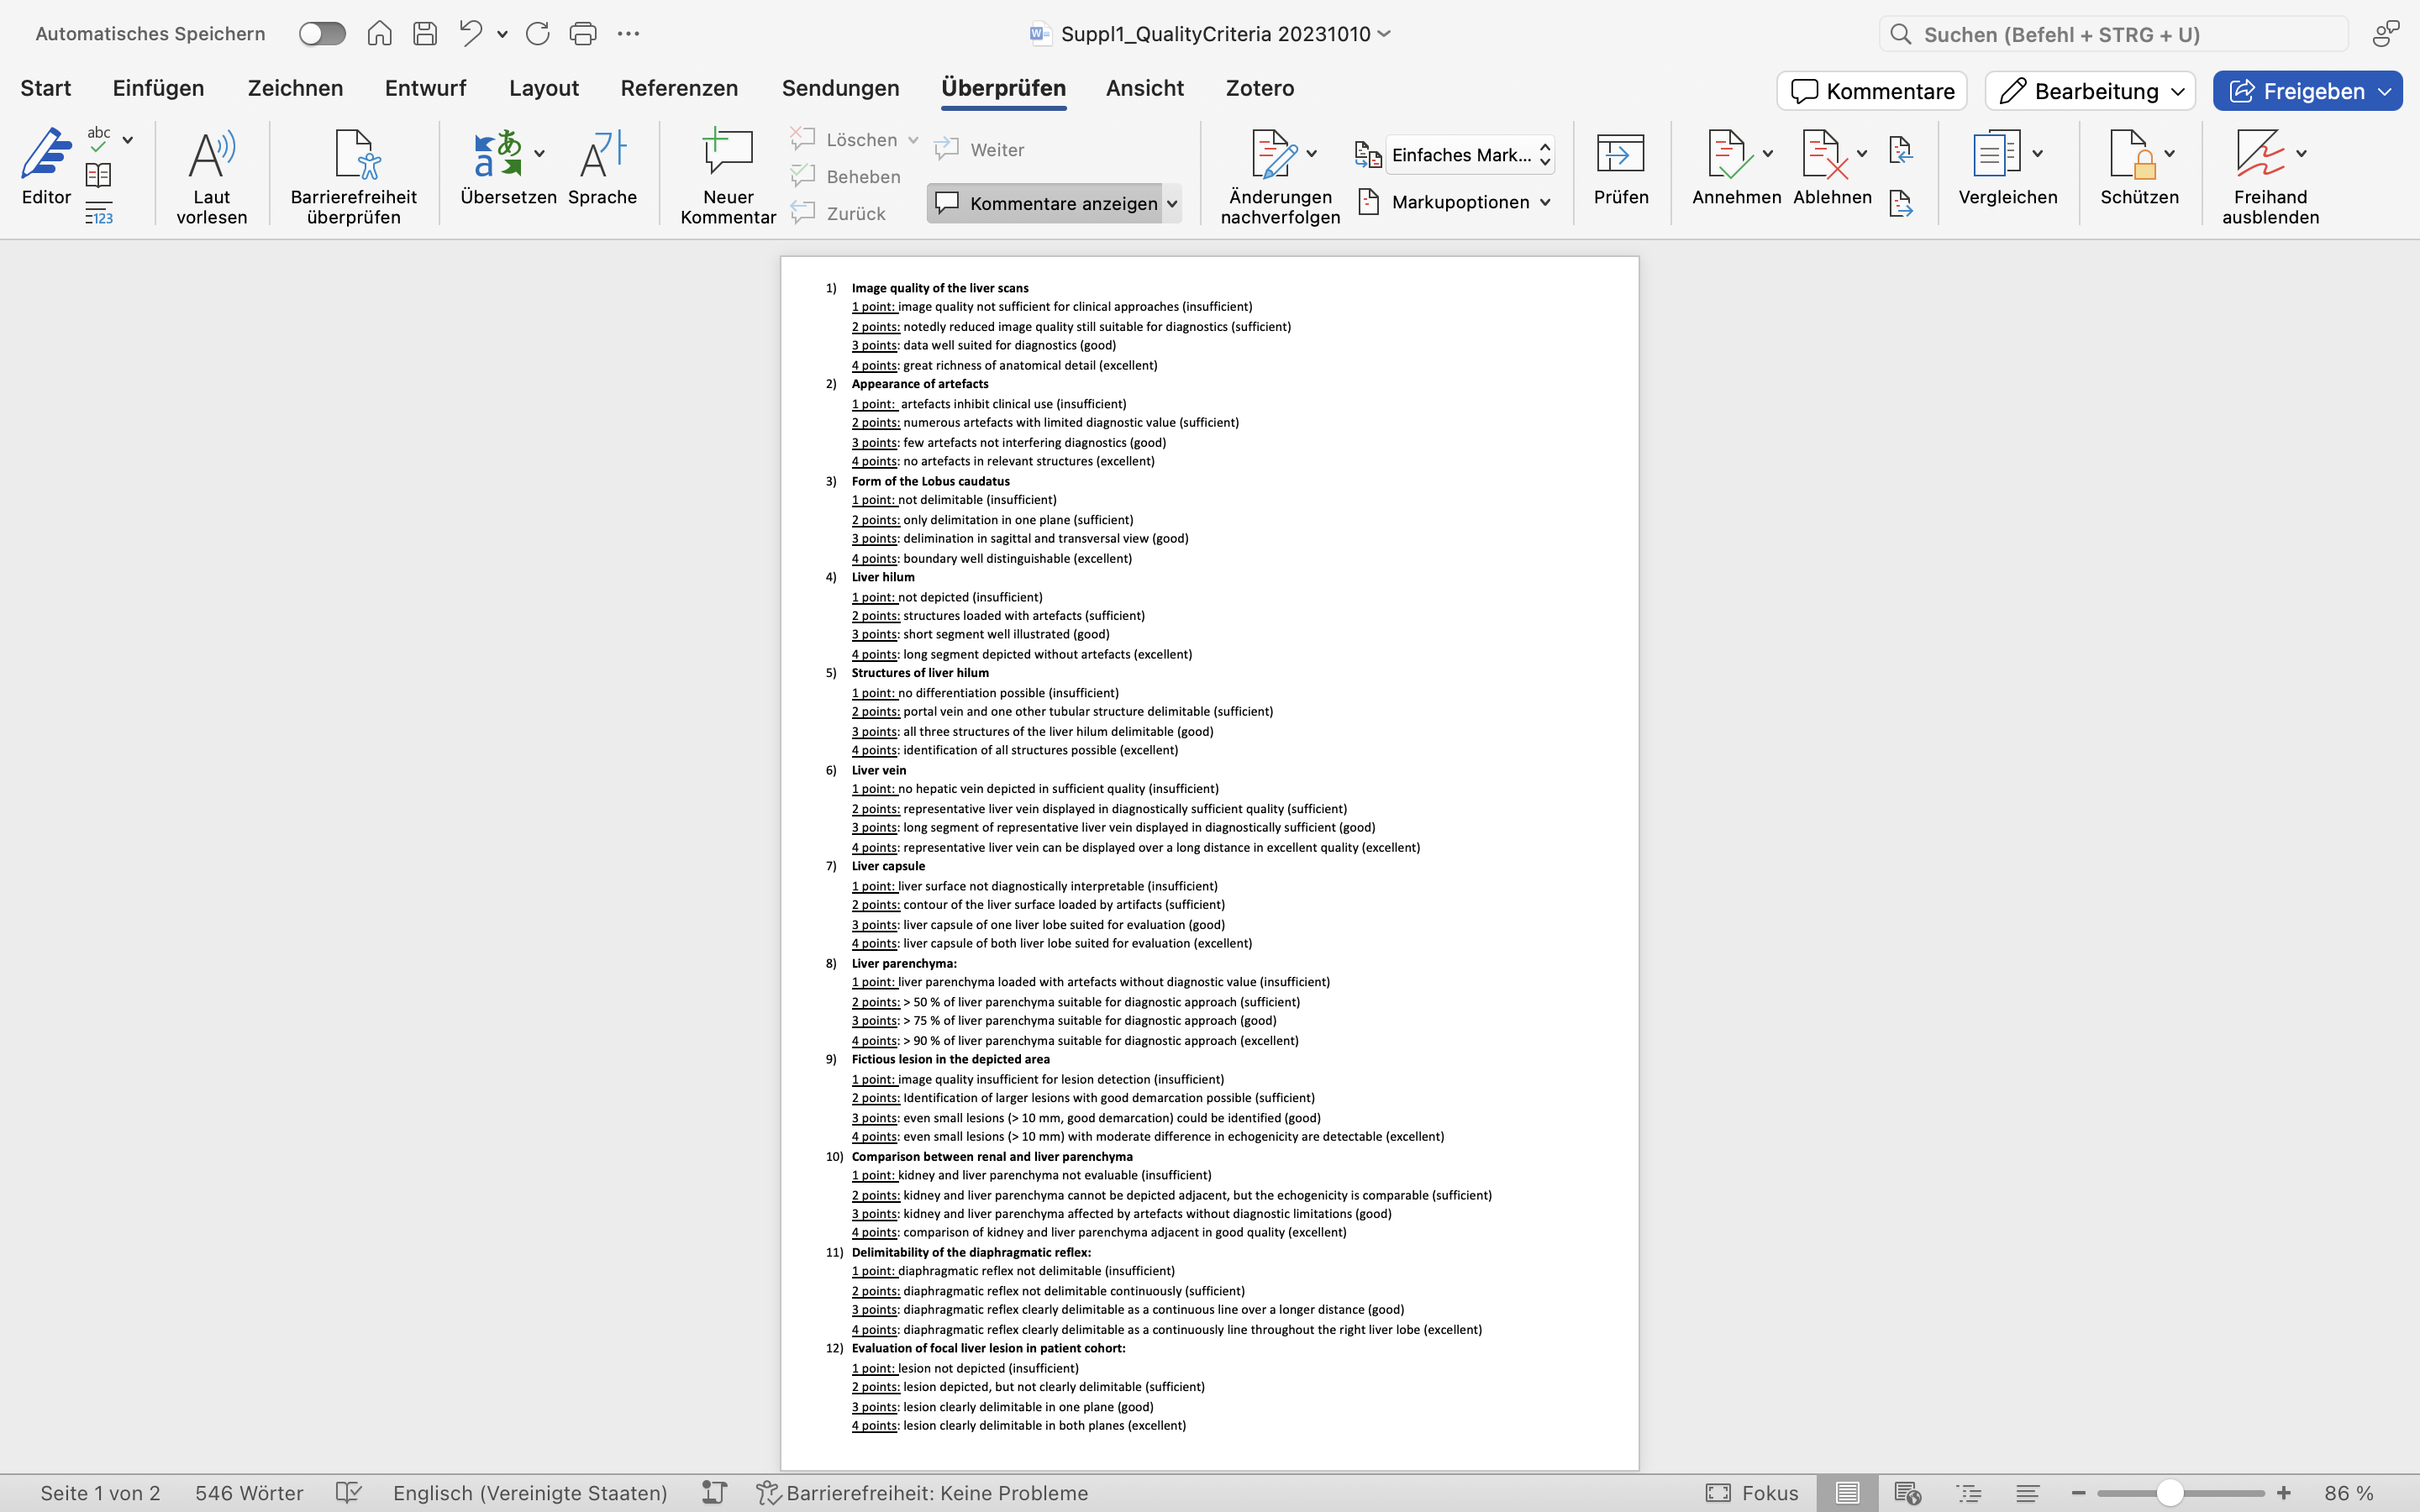
Supplement 2:** **Definition of the criteria for the evaluation of conventional and tomographic ultrasound images.**

| **Rating of average image quality of t3DUS compared to conUS (reference) in 22 healthy volunteers** | | | | | | | |
| --- | --- | --- | --- | --- | --- | --- | --- |
| **Total**  **(Scan1-6)** | | **Scan1** | **Scan2** | **Scan3** | **Scan4** | **Scan5** | **Scan6** |
|  |  |  |  |  |  |  |  |
| **Image quality (mean)** | **74%** | **69%** | **70%** | **79%** | **69%** | **67%** | **91%** |
| Image quality of the liver | 65% | 55% | 61% | 68% | 59% | 62% | 87% |
| Presentability of  lobus caudatus | 75% | 65% | 64% | 88% | 70% | 65% | 97% |
| Visualization of liver hilum | 80% | 77% | 70% | 86% | 80% | 68% | 99% |
| Identifiability of liver veins | 77% | 72% | 84% | 72% | 64% | 84% | 88% |
| Presentability of liver capsule | 75% | 72% | 66% | 86% | 74% | 61% | 92% |
| Quality of Liver parenchyma | 71% | 67% | 74% | 79% | 64% | 60% | 85% |
| Identifiability of a fictious lesion in the left liver lobe | 63% | 58% | 68% | 73% | 59% | 42% | 80% |
| Identifiability of a fictious lesion in the right liver lobe | 70% | 62% | 66% | 71% | 66% | 71% | 84% |
| Comparability between renal/liver parenchyma | 80% | 75% | 72% | 83% | 75% | 77% | 99% |
| Visibility of the diaphragmatic reflex | 89% | 92% | 89% | 88% | 82% | 86% | 99% |
|  | **Total**  **(Scan1-6)** | **Scan1** | **Scan2** | **Scan3** | **Scan4** | **Scan5** | **Scan6** |
| **Completeness of (mean)** | **74%** | **75%** | **75%** | **76%** | **79%** | **69%** | **73%** |
| Left liver lobe | 73% | 75% | 81% | 80% | 72% | 55% | 73% |
| Right liver lobe | 70% | 77% | 83% | 61% | 66% | 66% | 65% |
| Gallbladder | 75% | 81% | 71% | 79% | 98% | 59% | 61% |
| Pancreas | 95% | 98% | 98% | 96% | 98% | 87% | 94% |
| Right kidney | 72% | 70% | 70% | 67% | 73% | 71% | 78% |
| Left kidney | 36% | 34% | 29% | 38% | 34% | 46% | 35% |
| Aorta abdominalis | 83% | 77% | 78% | 91% | 92% | 80% | 80% |
| VCI | 93% | 88% | 89% | 95% | 95% | 91% | 100% |

**Supplement 3**: **Quality and completeness of different scanning procedures in healthy volunteers**.

Tomographic three-dimensional ultrasound (t3DUS); conventional ultrasound (conUS).

|  | **Image quality of t3DUS compared to conUS in patients with liver diseases** | | | | | | |
| --- | --- | --- | --- | --- | --- | --- | --- |
|  | **Total Scan A-C** | **ScanA** | | **ScanB** | | **ScanC** | |
| **Overall image quality** | **81%** | | **75%** | | **75%** | | **93%** |
| Subcohort MASLD | 87% | 81% | | 86% | | 95% | |
| Subcohort Cirrhosis | 75% | 67% | | 67% | | 94% | |
| Subcohort FNH | 82% | 77% | | 74% | | 94% | |
| Subcohort Hemangioma | 80% | 73% | | 74% | | 92% | |
| **Overall completeness** | **70%** | | **69%** | | **75%** | | **65%** |
|  | | | | | | | |
| **MASLD – image quality of** |  | | | | | | |
| Liver margin | 53% | 60% | | 80% | | 20% | |
| Echogenicity compared to renal parenchyma | 93% | 80% | | 100% | | 100% | |
| Attenuation of ultrasound signal | 80% | 80% | | 80% | | 80% | |
| Visibility of the diaphragmatic reflex | 40% | 40% | | 40% | | 40% | |
| Liver veins | 100% | 100% | | 100% | | 100% | |
| **Average (total)** | **73%** | **72%** | | **80%** | | **68%** | |
| **Cirrhosis – image quality of** |  | | | | | | |
| Liver capsule | 93% | 80% | | 100% | | 100% | |
| Liver parenchyma | 93% | 100% | | 80% | | 100% | |
| Boundary of liver veins | 73% | 60% | | 60% | | 100% | |
| Visibility of peripheral intrahepatic vessels | 67% | 80% | | 60% | | 60% | |
| Measurement of lobus caudatus (mm) | 91%* | 89% | | 91%* | | 92% | |
| **Average (total)** | **80%** | **78%** | | **76%** | | **89%** | |
| **FNH – image quality of** |  | | | | | | |
| Measurement diameter of lesion (mm) | 85% | 88% | | 80% | | 86% | |
| Echogenicity of lesion | 93% | 100% | | 80% | | 100% | |
| Boundary of lesion | 100% | 100% | | 100% | | 100% | |
| Visibility of lesion in two planes | 85% | 85% | | 80% | | 90% | |
| **Average (total)** | **93%** | **95%** | | **88%** | | **95%** | |
| **Haemangioma – image quality of** |  | | | | | | |
| Measurement diameter of lesion (mm) | 88%* | 88% | | 86% | | 88%* | |
| Echogenicity of lesion | 81% | 86% | | 71% | | 86% | |
| Boundary of lesion | 95% | 100% | | 100% | | 86% | |
| Visibility of lesion in two planes | 85% | 86% | | 79% | | 92% | |
| **Average (total)** | **88%** | **89%** | | **87%** | | **87%** | |
|  | | | | | | | |
| *: excluding 1 patient where data is not available | | | | | | | |

**Supplement 4**: **Quality and completeness of tomographic three-dimensional ultrasound (t3DUS) in patients with liver diseases according to the scanning procedure.**

Conventional ultrasound (conUS). Focal nodular hyperplasia (FNH)


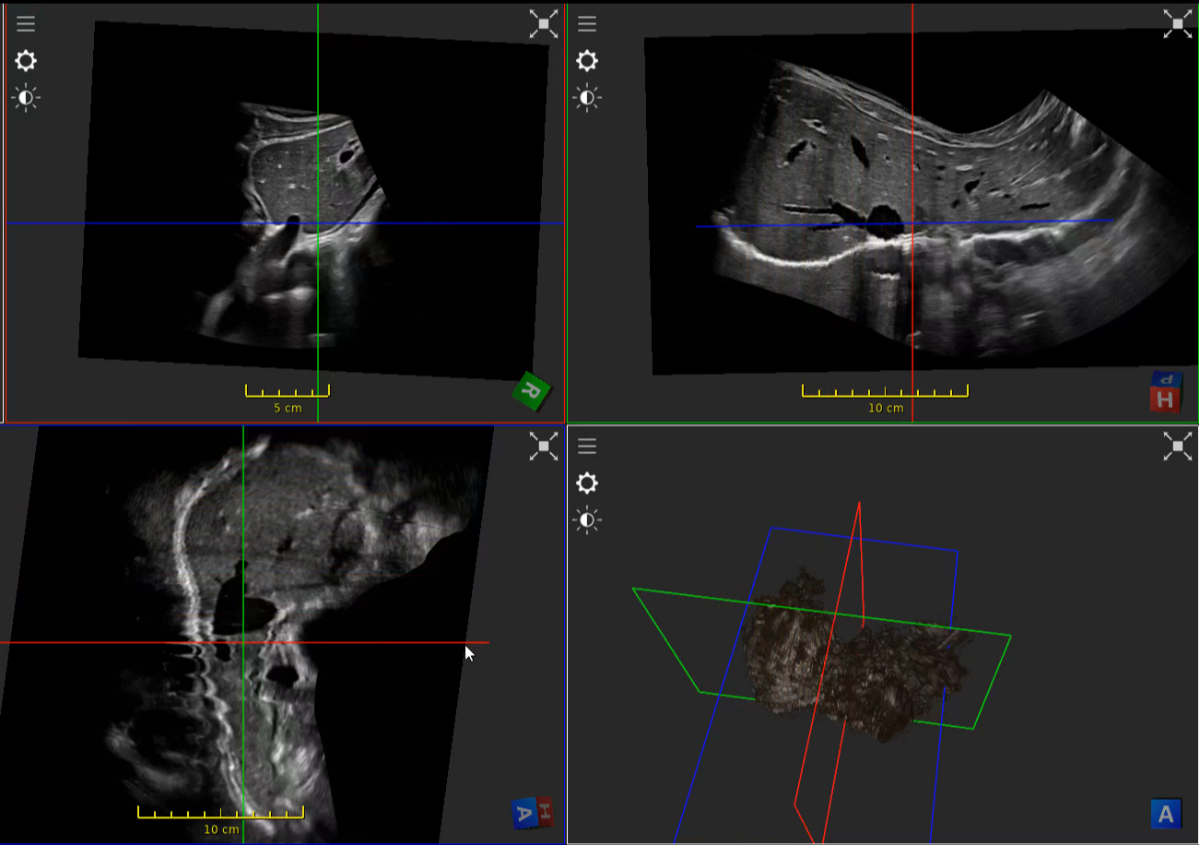


**Supplement 5** **Tomographic ultrasound scan of a comprehensive liver examination (Movie).**

The upper left corner shows the conventional fundamental ultrasound data equipped with spatial information. Multiple view planes illustrate the calculated tomographic ultrasound data.


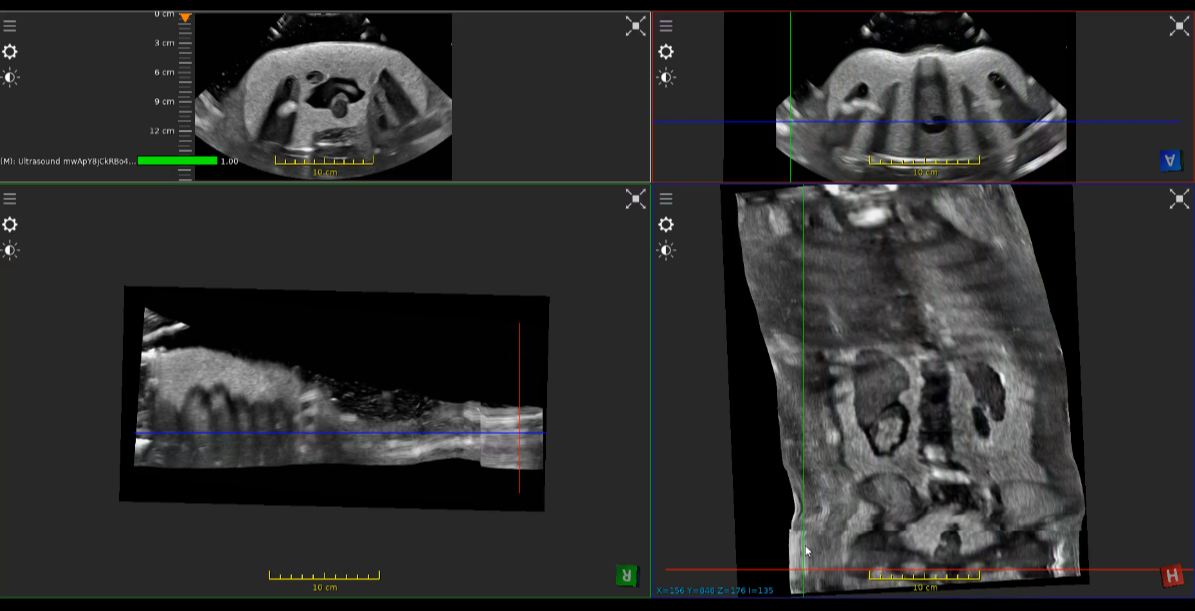


**Supplement 6** **Tomographic ultrasound scan of a paediatric ultrasound phantom (Movie).**

The upper left corner shows the conventional fundamental ultrasound data equipped with spatial information. Multiple view planes illustrate the calculated tomographic ultrasound data.
